# Supplementary material for: Intergenerational effect of short-term spaceflight in mice
Source: PubMed Central journal article supplement — iScience. 2021 Jun 25;24(7):102773. doi: 10.1016/j.isci.2021.102773 (PMC8271179; doi:10.1016/j.isci.2021.102773), 2021-06-25
Supplement: mmc1.pdf [file mmc1.pdf]

**Supplemental information**

**Intergenerational effect of short-term  
spaceflight in mice**

**Keisuke Yoshida, Shin-ichiro Fujita, Ayako Isotani, Takashi Kudo, Satoru  
Takahashi, Masahito Ikawa, Dai Shiba, Masaki Shirakawa, Masafumi  
Muratani, and Shunsuke Ishii**

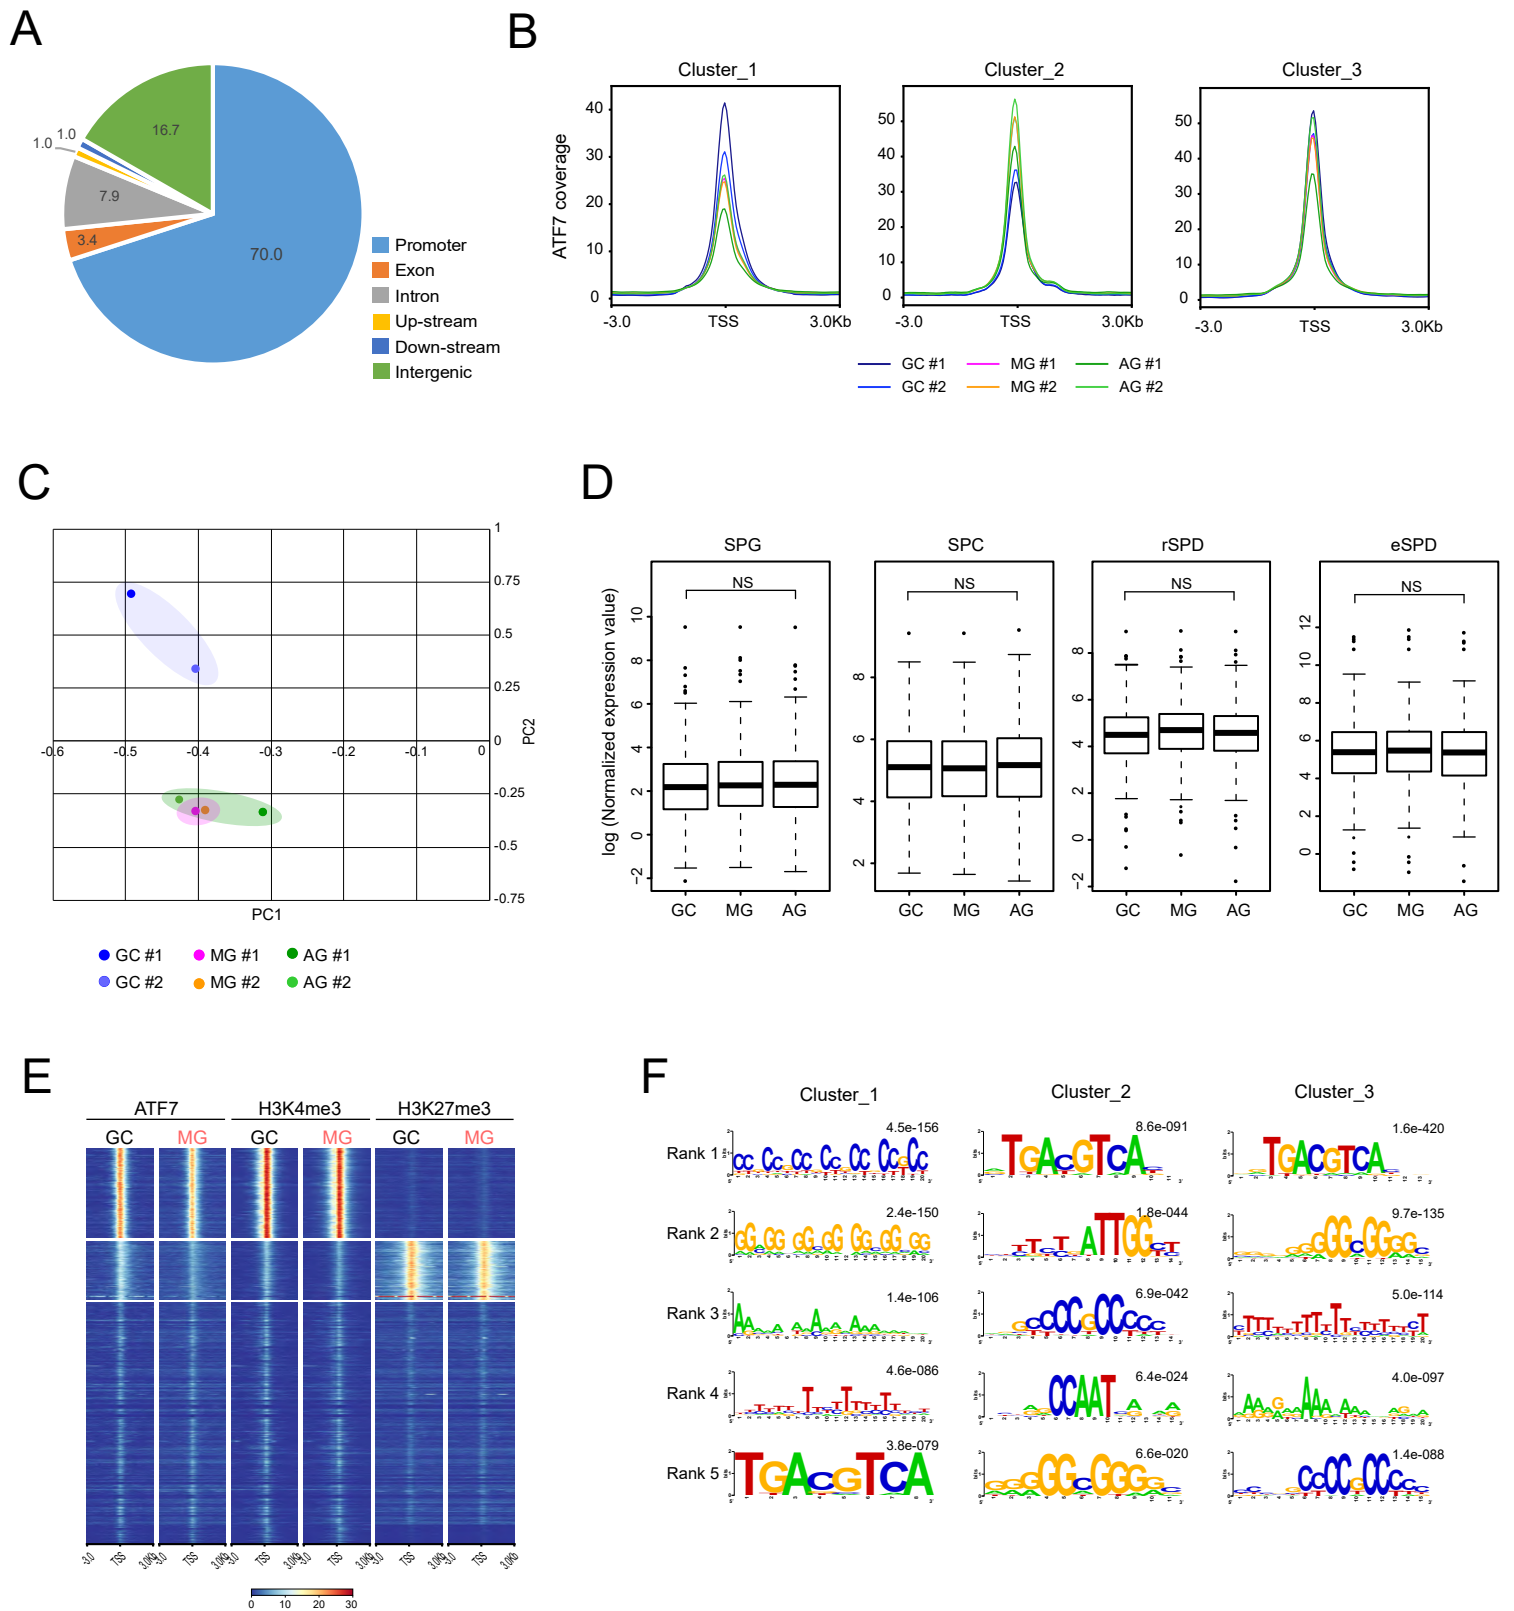

**Figure S1, Characteristics of ATF7-binding Genes in TGCs, Related to Figure 1.**

- (A) Genomic distribution of ATF7 binding sites in GC mice.
- (B) Profile plots for each cluster of signal intensity of ATF7 ChIP-seq using TGCs from GC, MG, and AG mice.
- (C) PCA result for signal intensity of ATF7 ChIP-seq on ATF7-binding sites including clusters 1, 2, and 3.
- (D) Box plot of expression level of marker genes of each spermatogenic cell in GC, MG, or AG testis. P-value was calculated using the Kruskal-Wallis one-way analysis of variance. N.S., not significant.
- (E) Heatmap of signal intensities from ATF7, H3K4me3, and H3K27me3 ChIP-seq data using GC/MG TGCs across all TSS. Raw reads were scaled to mapped regions in each sample (reads per million).
- (F) The most likely binding motifs of ATF7-binding sequences belonging to each cluster in TGCs, extracted by the MEME algorithm. E values for each motif are shown on the upper right of each plot.

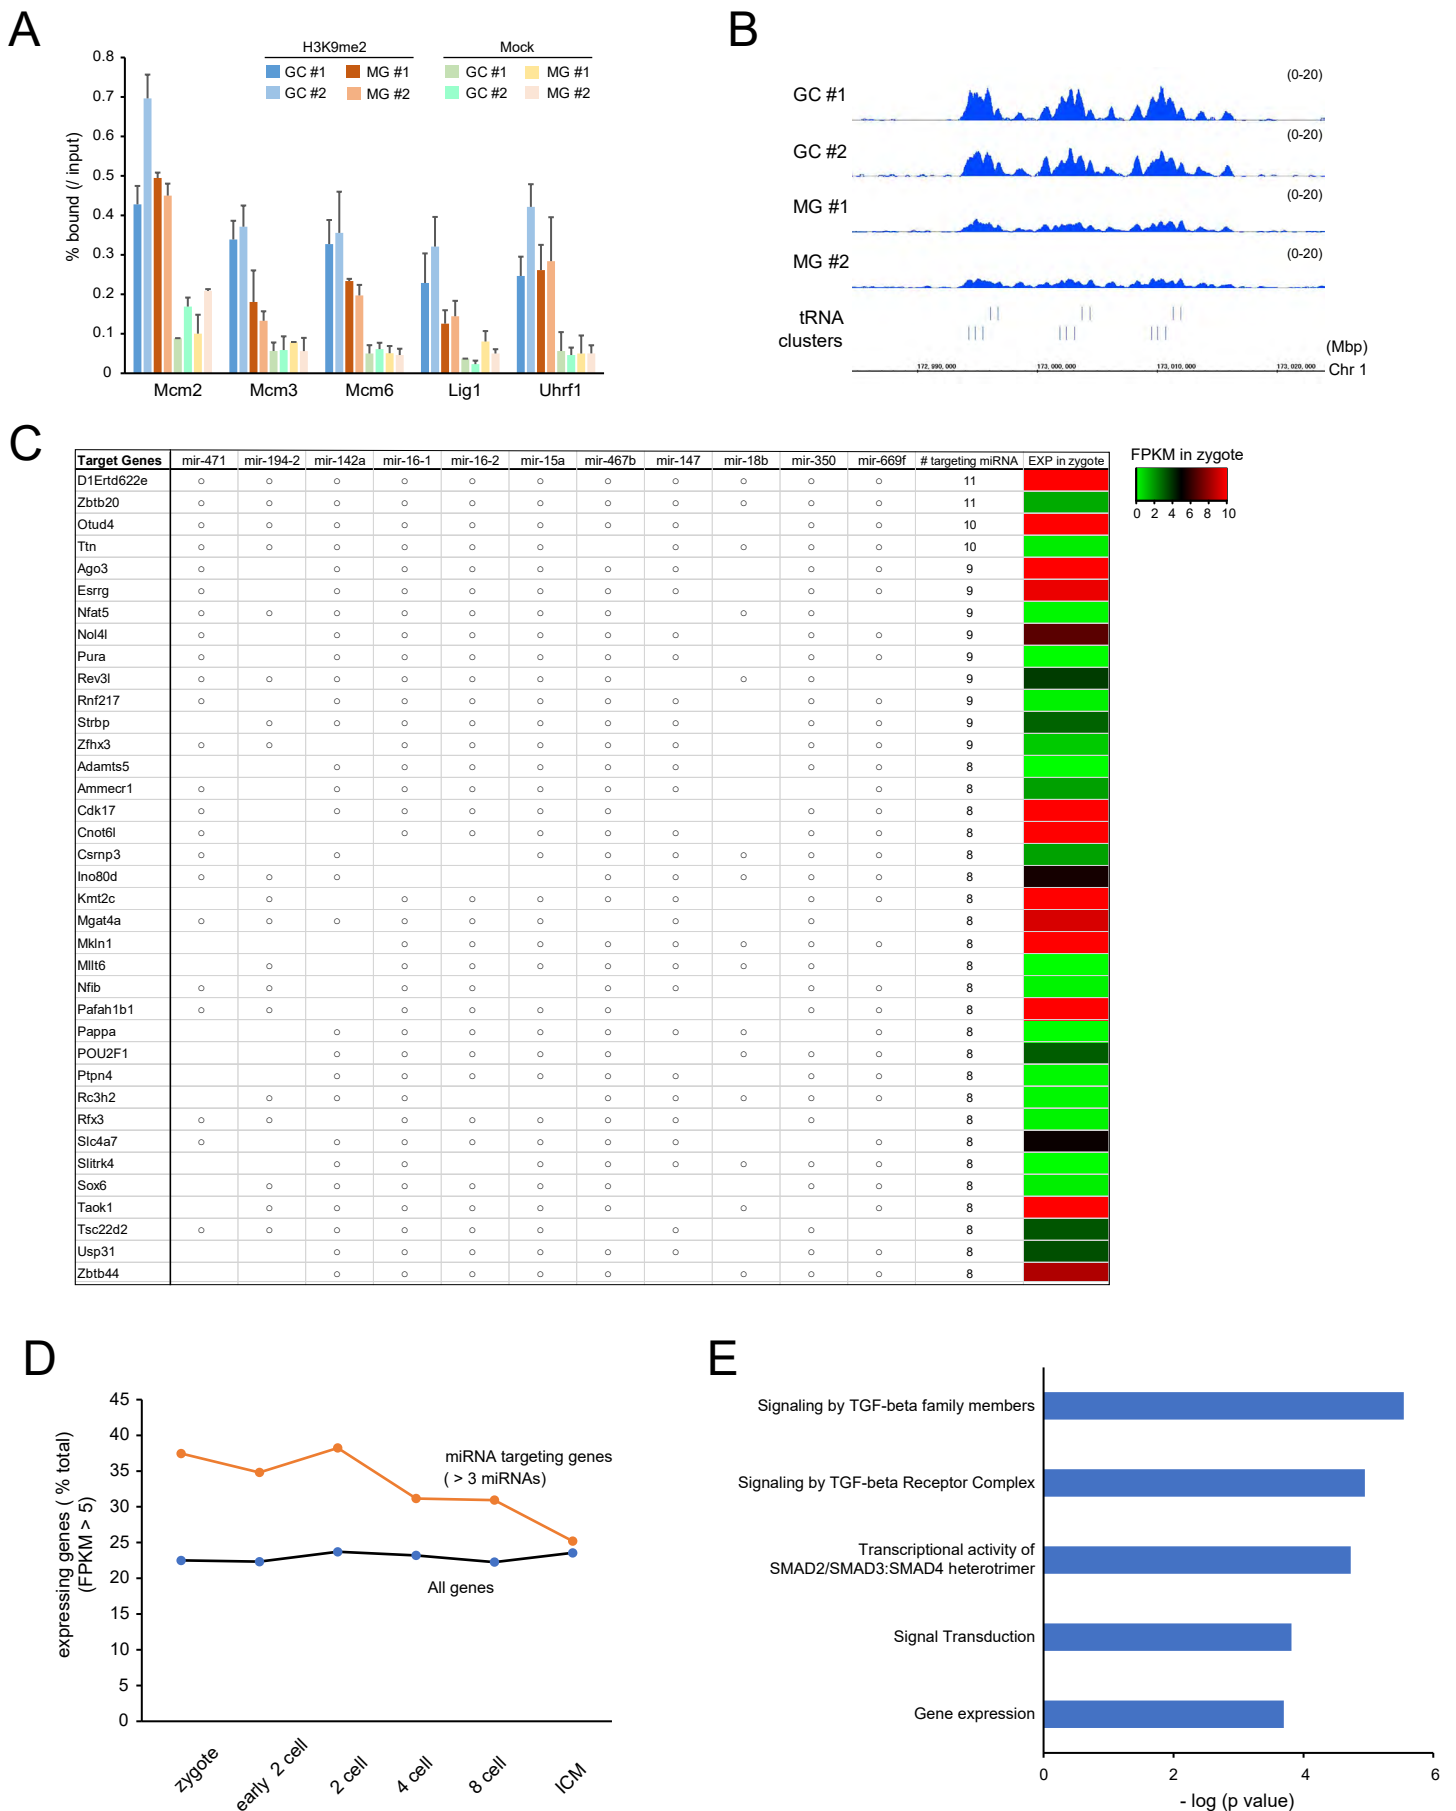

**Figure S2, MG-induced Alteration of Epigenetic Level and Small RNA Expression in Spermatozoa, Related to Figure 2.**

(A) H3K9me2 qChIP assay for ATF7 target genes in testis using HRCS collected from GC and MG mice ( $n = 2$ ). Values were obtained by calculating the amount of DNA after ChIP and PCR amplification relative to input DNA, and experimental errors of qPCR ( $n=3$ ) are indicated by error bars (mean  $\pm$  SD).

(B) ATF7 ChIP-seq data in TGCs from GC or MG mice for the tRNA cluster region of three tandem loci on chromosome 1 (horizontal axis). Blue signals indicate the number of raw reads, which is scaled to mapped regions in each sample.

- (C) Genes multiply targeted by 8 of 11 miRNAs. The targeting miRNA to each gene is indicated by “○”. The expression level of each gene in zygote is indicated by color scale.
- (D) Ratio of expressed genes (FPKM > 5) to total genes in embryogenesis for all genes and genes targeted by at least four miRNAs.
- (E) Reactome pathway analysis for genes targeted by at least four miRNAs.

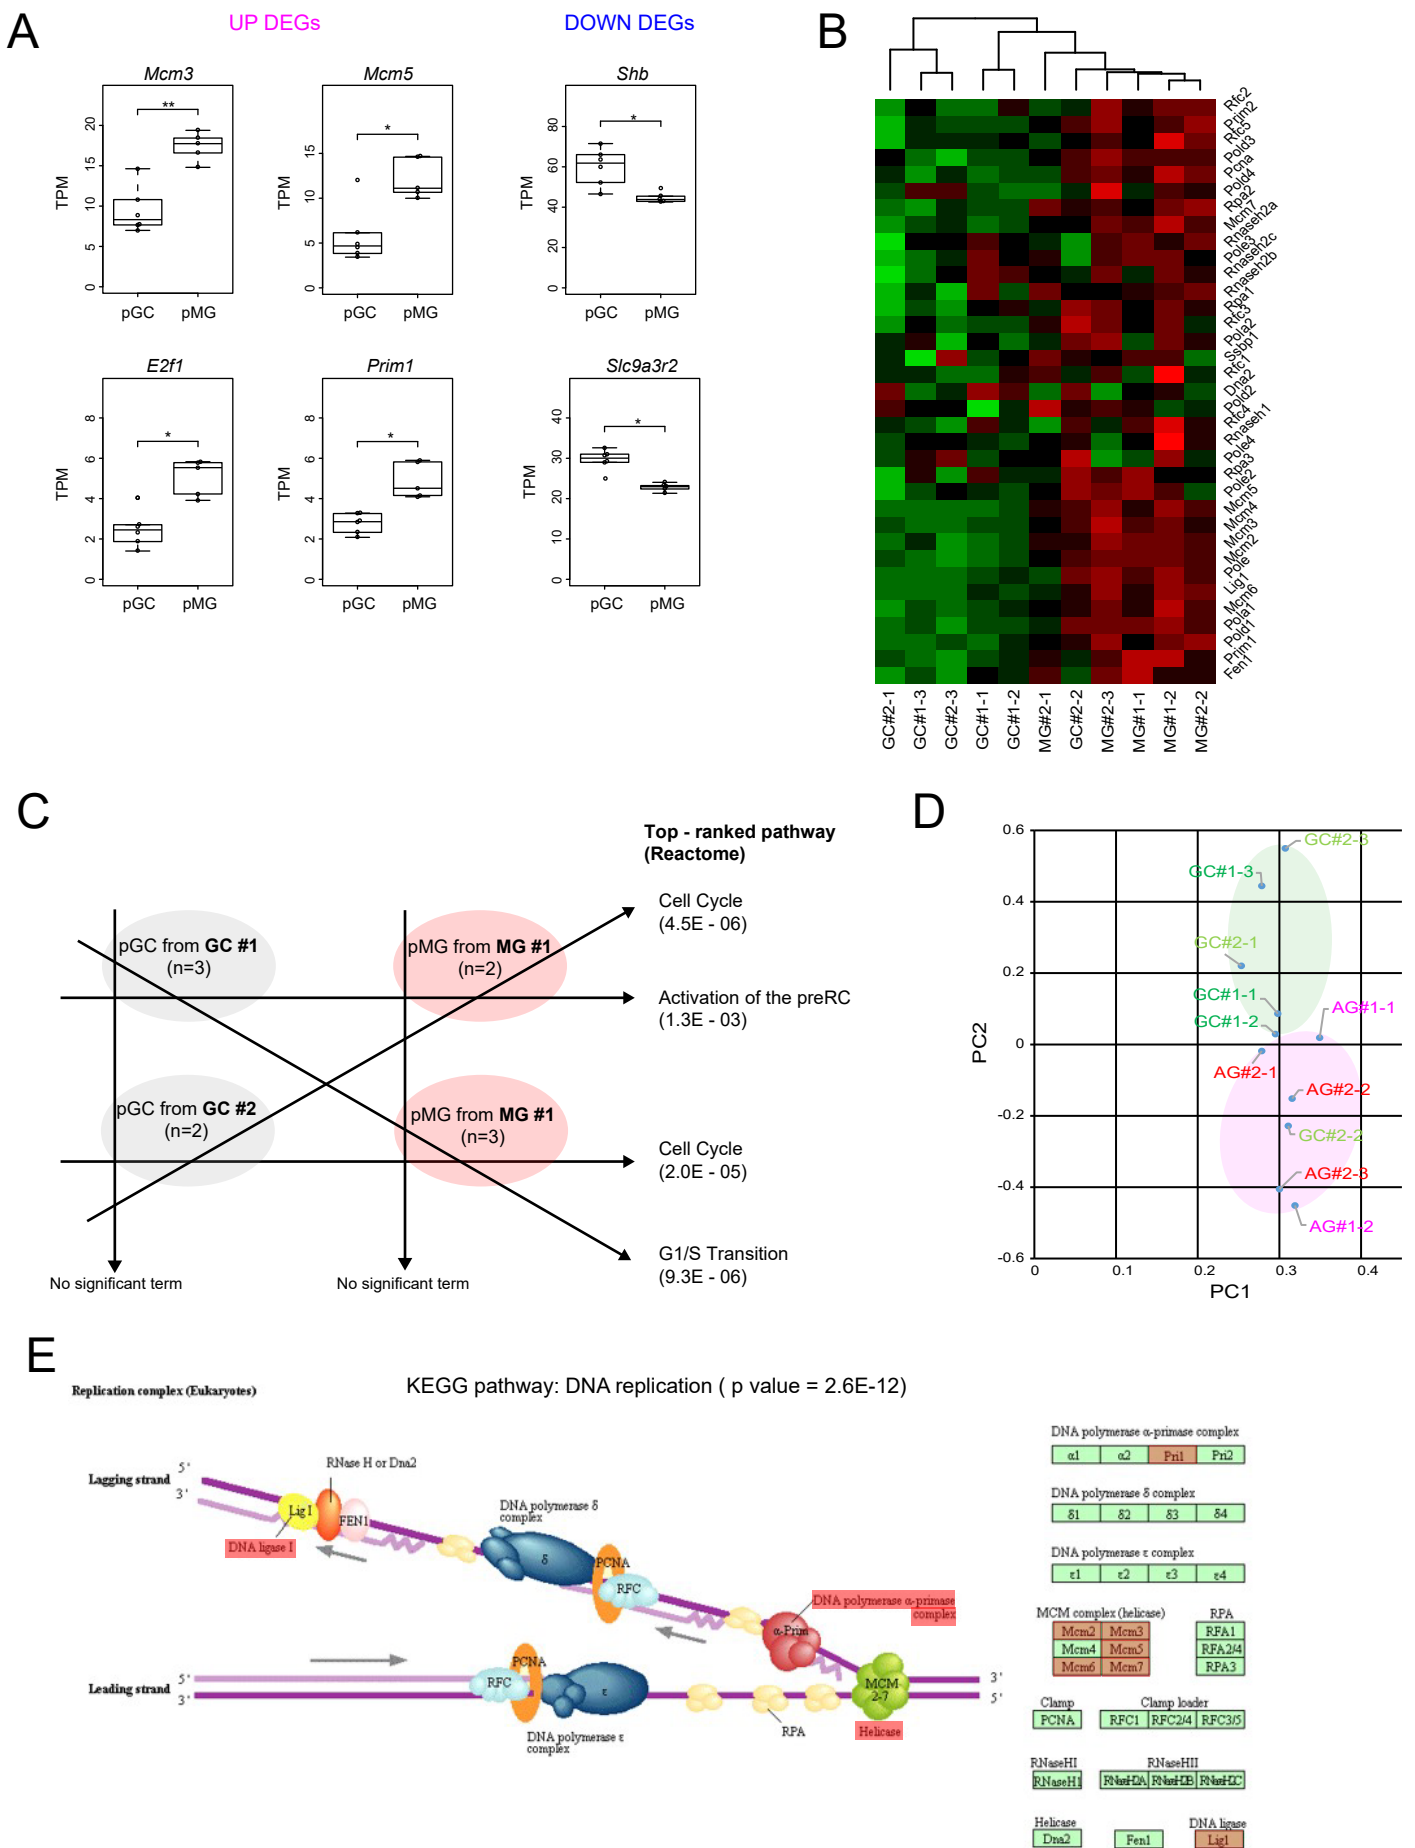

**Figure S3, Effect of Paternal Spaceflight on Hepatic Expression in F1 Mouse, Related to Figure 3.**

(A) Box plot of expression levels of typical DEGs (four genes of upregulated DEGs and two genes of downregulated DEGs).

(B) Heatmap for expressions of DNA replication-related genes (KEGG; mmu03030) in individual F1 data.

(C) Cross-comparison of expression profiles between each group of data-set (only GC#2-2 was removed as outlier). Reactome pathway analysis was performed in each comparison.

(D) PCA result of expression of genes up-regulated in proliferating cells (Gene set; M5198) for individual pGC and pMG F1 sample.

(E) KEGG pathway; “replication complex (eukaryote) belonging to DNA replication (mmu03030)”, with upregulated DEGs shown in red.

**Table S3. List of KEGG pathways in miRNA-targeting genes, related to Figure 2**

| KEGG pathway                                              | p-value   | #genes | #miRNAs |
|-----------------------------------------------------------|-----------|--------|---------|
| TGF-beta signaling pathway                                | 1.41E-06  | 34     | 16      |
| Pathways in cancer                                        | 2.23E-06  | 111    | 18      |
| Signaling pathways regulating pluripotency of stem cells  | 3.88E-06  | 46     | 19      |
| Endocytosis                                               | 1.83E-05  | 67     | 16      |
| Axon guidance                                             | 1.84E-05  | 46     | 17      |
| Proteoglycans in cancer                                   | 6.60E-05  | 61     | 18      |
| Ras signaling pathway                                     | 0.0002394 | 65     | 16      |
| Hippo signaling pathway                                   | 0.0002394 | 53     | 17      |
| MAPK signaling pathway                                    | 0.0002394 | 72     | 19      |
| PI3K-Akt signaling pathway                                | 0.0003098 | 92     | 18      |
| Rap1 signaling pathway                                    | 0.0007591 | 59     | 17      |
| Hedgehog signaling pathway                                | 0.0010769 | 21     | 13      |
| cAMP signaling pathway                                    | 0.0012308 | 57     | 18      |
| FoxO signaling pathway                                    | 0.0012826 | 41     | 19      |
| Glutamatergic synapse                                     | 0.002025  | 31     | 13      |
| Thyroid hormone synthesis                                 | 0.00316   | 18     | 12      |
| Neurotrophin signaling pathway                            | 0.0033429 | 39     | 16      |
| Lysine degradation                                        | 0.0036192 | 13     | 10      |
| Endocrine and other factor-regulated calcium reabsorption | 0.0036192 | 17     | 12      |
| Renal cell carcinoma                                      | 0.0036192 | 22     | 13      |
| Phosphatidylinositol signaling system                     | 0.0036192 | 26     | 14      |
| Regulation of actin cytoskeleton                          | 0.0036192 | 61     | 17      |
| Amphetamine addiction                                     | 0.0050716 | 19     | 12      |
| Adherens junction                                         | 0.008575  | 22     | 12      |

**Table S5. GSEA result of F1 transcriptome (top 20), related to Figure 3**

| NAME_1                | NAME_2                                             | ES       | FDR q-val |
|-----------------------|----------------------------------------------------|----------|-----------|
| DUTERTRE              | ESTRADIOL RESPONSE 24HR UP                         | 0.71797  | < 1.0E-06 |
| GNF2                  | CCNA2                                              | 0.830044 | < 1.0E-06 |
| ROSTY                 | CERVICAL CANCER PROLIFERATION CLUSTER              | 0.75977  | < 1.0E-06 |
| BLANCO_MELO_BRONCHIAL | EPITHELIAL CELLS INFLUENZA ADEL_NS1 INFECTION (DN) | 0.747079 | < 1.0E-06 |
| SOTIRIOU              | BREAST CANCER GRADE 1VS3 UP                        | 0.739854 | < 1.0E-06 |
| GNF2                  | PCNA                                               | 0.817506 | < 1.0E-06 |
| GRAHAM                | NORMAL QUIESCENT VS NORMAL DIVIDING (DN)           | 0.783831 | < 1.0E-06 |
| KOBAYASHI             | EGFR SIGNALING 24HR(DN)                            | 0.702698 | < 1.0E-06 |
| ZHOU                  | CELL CYCLE GENES IN_R_RESPONSE 6HR                 | 0.796277 | < 1.0E-06 |
| GNF2                  | CENPF                                              | 0.819451 | < 1.0E-06 |
| GNF2                  | CDC2                                               | 0.824043 | < 1.0E-06 |
| GNF2                  | CDC20                                              | 0.832537 | < 1.0E-06 |
| GNF2                  | MCM4                                               | 0.819881 | < 1.0E-06 |
| KONG                  | E2F3 TARGETS                                       | 0.758044 | < 1.0E-06 |
| GNF2                  | RFC4                                               | 0.81371  | < 1.0E-06 |
|                       | MODULE_54                                          | 0.6878   | < 1.0E-06 |
| GNF2                  | CCNB2                                              | 0.81184  | < 1.0E-06 |
| ZHOU                  | CELL CYCLE GENES IN_R_RESPONSE 24HR                | 0.729285 | < 1.0E-06 |
| GNF2                  | FEN1                                               | 0.805418 | < 1.0E-06 |
| GNF2                  | RRM1                                               | 0.76176  | < 1.0E-06 |



**Table S6. List of primers for qChIP experiment, related to STAR Methods**

| Primer Name | Forward              | Reverse               |
|-------------|----------------------|-----------------------|
| Mcm2        | CGCGCGAAAAGTAGACCAC  | TCCTTCCGCTCTAGATTGACG |
| Mcm3        | CGTCATCCAGGAAGTCCAAG | CGTTTCCGACTGTTTGGTG   |
| Mcm6        | GTTCCACGCGTAGCTCCTTC | CCCTGTTATTGGCTGAGGTG  |
| Uhrf1       | GGGAAGGGCGGAACTTAAAC | CTAACTCCCCTCGGGACAC   |
| Lig1        | AGTGCGCGCGAAATCTG    | CGCCACACTCGTCACTC     |
